# Supplementary material for: Eukaryotic translation initiation factor 5A2 regulates the migration and invasion of hepatocellular carcinoma cells via pathways involving reactive oxygen species
Source: PubMed Central journal article supplement (PMC5029706; doi:10.18632/oncotarget.8324), 2016-03-23
Supplement: oncotarget-07-24348-s001.pdf [file oncotarget-07-24348-s001.pdf]

## Eukaryotic translation initiation factor 5A2 regulates the migration and invasion of hepatocellular carcinoma cells *via* pathways involving reactive oxygen species

### Supplementary Materials

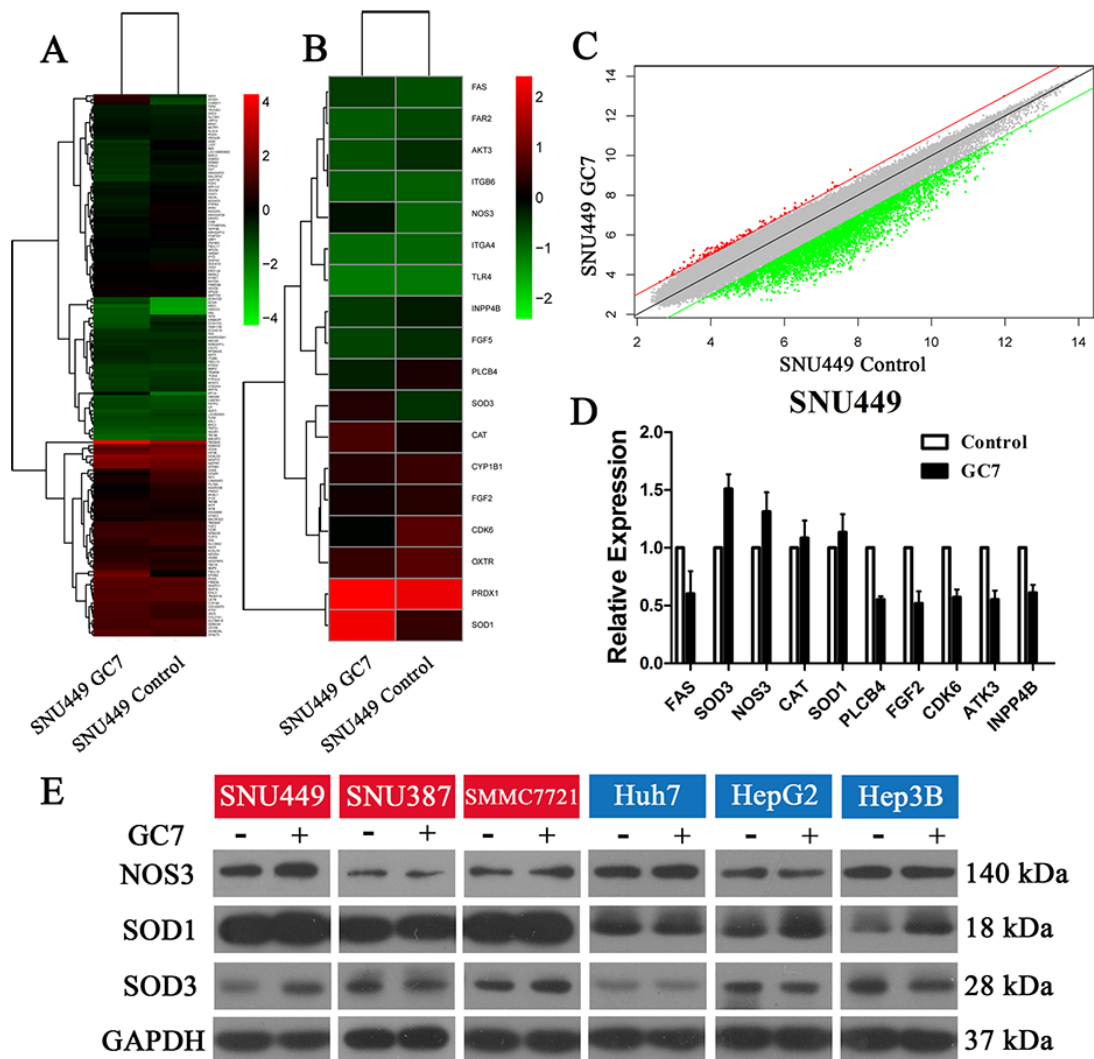

**Supplementary Figure S1: Gene-chip screening revealed many differences in the expression of genes in HCC cells.** (A) Microarray heat-map showed the differences in the expression profiles of SNU449 cells (fold change  $\geq 2$ ) treated with GC7 (red, up-regulation; green, down-regulation). (B) Microarray heat-map of ROS-related gene expression changes in SNU449 cells treated with GC7 (red, up-regulation; green, down-regulation) (fold change  $\geq 2$ ). (C) Scatterplot of expression changes in SNU449 cells treated with GC7 (red, up-regulation, fold change  $\geq 2$ ; gray, no significant change, fold change  $< 2$ ; green, down-regulation, fold change  $\geq 2$ ) based on microarray heat-maps at the transcription level. (D) Real-time PCR was performed to confirm the *mRNA* differences based on microarray heat-maps at the transcription level. Data are mean  $\pm$  SEM. (E) Western blotting of ROS gene expression: *SOD1*, *SOD3*, and *NOS3*. Each experiment was repeated at least three times.

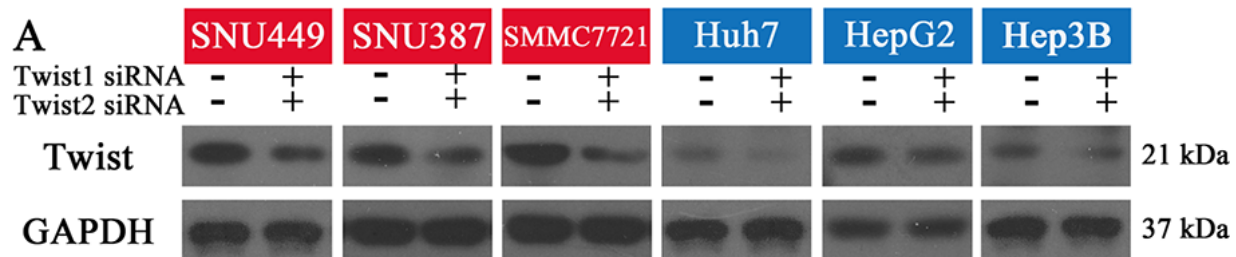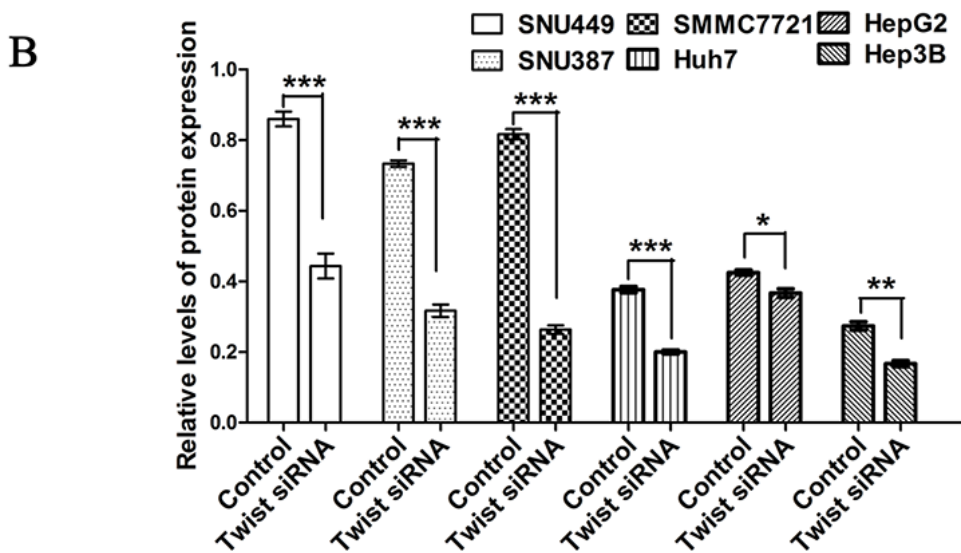

**Supplementary Figure S2:** (A) Western hybridization confirmed the success of *twist1/2* siRNA transfection. (B) Bar graphs based on quantitative data from (A). Data are mean  $\pm$  SEM. \* $P < 0.05$ , \*\* $P < 0.01$ , \*\*\* $P < 0.001$  versus control. Each experiment was repeated at least three times.
